# Supplementary material for: Changes in the cerebrospinal fluid circulatory system of the developing rat: quantitative volumetric analysis and effect on blood-CSF permeability interpretation
Source: Springer Nature journal article supplement (doi:10.1186/s12987-015-0001-2), 2015-01-01
Supplement: MOESM1 [file 12987_2015_1_MOESM1_ESM.pdf]

**Additional file 1: Volumes of CSF compartments in 19-day-old rat embryo (E19), 2-day-old rats (P2) and 9-day-old rats (P9)**

|                   | E19   |      | P2   |      | P9    |      |
|-------------------|-------|------|------|------|-------|------|
|                   | Mean  | SD   | Mean | SD   | Mean  | SD   |
| Animal weight (g) | nd    | nd   | 7.95 | 0.30 | 18.13 | 0.22 |
| SasC              | 5.12  | 1.10 |      |      |       |      |
| SasCb             | 3.72  | 0.42 | 8.93 | 2.09 | 12.88 | 2.76 |
| LR                | 3.68  | 0.41 | 5.58 | 0.93 | 13.85 | 2.38 |
| 4V                | 0.81  | 0.09 | 0.98 | 0.16 | 0.81  | 0.25 |
| Aq                | 1.17  | 0.14 | 0.73 | 0.14 | 0.26  | 0.07 |
| Qci               | 3.79  | 0.77 | 6.93 | 1.57 | 8.61  | 0.73 |
| Sasbl             | 0.87  | 0.44 | 4.81 | 0.46 | 3.23  | 1.16 |
| AmbCi             | 6.98  | 0.44 | 9.87 | 0.88 | 8.16  | 1.97 |
| SasCx             | 10.16 | 1.22 | 7.27 | 1.76 | 7.17  | 1.40 |
| LV                | 3.34  | 0.95 | 2.95 | 0.74 | 1.89  | 0.21 |
| MBCi              | 0.44  | 0.20 | 2.76 | 0.83 | 2.64  | 0.36 |
| 3Vd               | 0.35  | 0.06 | 0.44 | 0.08 | 1.41  | 0.29 |
| VI                | 0.55  | 0.11 | 0.76 | 0.31 | 1.56  | 0.17 |
| OptCi             | 2.29  | 0.39 | 3.57 | 0.21 | 4.92  | 1.09 |
| 3Vv               | 0.20  | 0.21 | 0.15 | 0.03 | 0.52  | 0.13 |
| Rhf               | -     | -    | 2.43 | 0.44 | 2.80  | 0.34 |
| Sasd              | 1.85  | 0.30 | 1.80 | 0.35 | 4.50  | 0.18 |
| Cilt              | 0.61  | 0.43 | 0.64 | 0.25 | 1.35  | 0.48 |
| Sasant            | 3.49  | 1.18 | 2.57 | 0.86 | 4.26  | 1.31 |
| SasOb             | 3.16  | 0.44 | 8.48 | 1.34 | 12.15 | 1.44 |

Mean and Standard deviation (SD) from 4 (E19, P9) and 5 (P2) animals are given in  $\mu$ l. See Table 1 in the text for CSF compartment abbreviations.

nd: not determined. -: not visible.
